# Supplementary material for: Atomistic-Level Description of the Covalent Inhibition of SARS-CoV-2 Papain-like Protease
Source: MDPI journal article supplement (doi:10.3390/ijms23105855), 2022-05-23
Supplement: s1 [file s1]

# Supporting Information for

## **Atomistic-level description of the covalent inhibition of SARS-CoV-2 papain-like protease**

Cécilia Hognon <sup>1</sup>, Marco Marazzi <sup>1,2\*</sup> and Cristina García-Iriepa <sup>1,2\*</sup>

<sup>1</sup> Universidad de Alcalá, Departamento de Química Analítica, Química Física e Ingeniería Química, Grupo de Reactividad y Estructura Molecular (RESMOL), Alcalá de Henares, Madrid, Spain; cecilia.hognon@uah.es

<sup>2</sup> Universidad de Alcalá, Instituto de Investigación Química “Andrés M. del Río” (IQAR), Alcalá de Henares, Madrid, Spain; marco.marazzi@uah.es; cristina.garciai@uah.es

\* Correspondence: marco.marazzi@uah.es; cristina.garciai@uah.es

### Content

1. RMSD analysis
2. MM-PBSA results
3. Time series data for the corresponding histograms
4. Ligand departure from the protease pocket in state D
5. Analysis of the thiol group conformations for Cys<sup>111</sup>
6. QM/MM energy barrier for Cys<sup>111</sup> deprotonation
7. Hydrogen-bond interaction analysis ligand-protease
8. BL2 loop conformation analysis for state D
9. Conformations of the ligand CH<sub>2</sub>-CO-NH group
10. Distance analysis for state D between the Cys<sup>111</sup>-S<sup>-</sup> and Vir251-C<sub>β</sub> or His<sup>272</sup>-H<sup>+</sup>
11. Hydrogen-bond interaction analysis between the vinyl methyl ester group and water molecules or protease side chains
12. Ligand force field details

## 1. RMSD simulation analysis

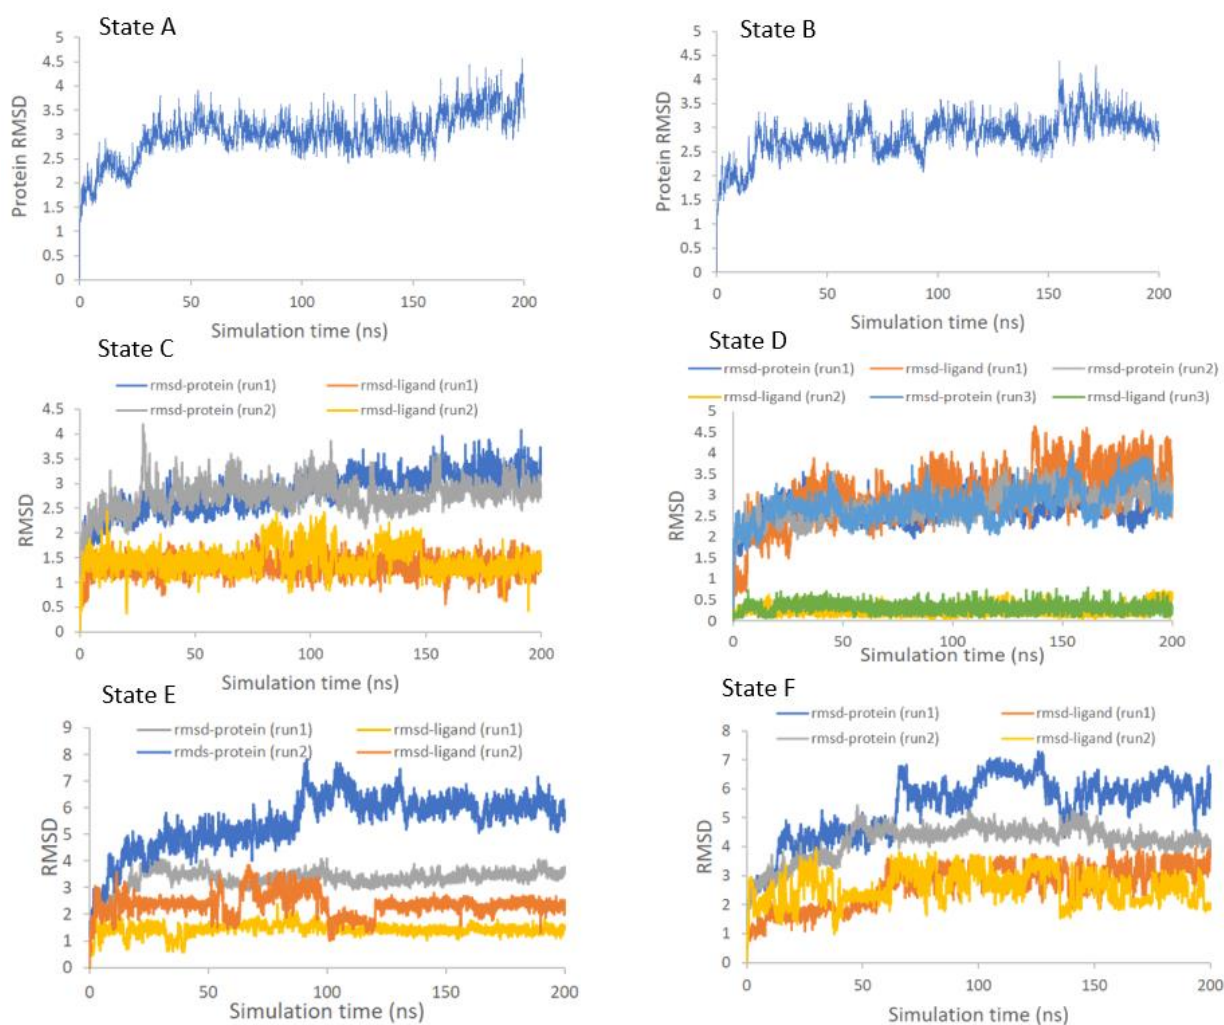

**Figure S1.** Protein RMSD analysis for each mechanism state under study (see Figure 1 for state nomenclature). For states C-F also the ligand RMSD analysis is depicted.

## 2. MMPBSA results

**Table S1.** MMPBSA results.

| Step              | Run | $\Delta G$ (kcal/mol) | $T\Delta S$ (kcal/mol) | $\Delta H$ (kcal/mol) |
|-------------------|-----|-----------------------|------------------------|-----------------------|
| A $\rightarrow$ C | 1   | $-16.8722 \pm 6.1415$ | $-31.1789 \pm 3.987$   | -48,0511              |
|                   | 2   | $-14.3902 \pm 7.0834$ | $-30.5637 \pm 4.7092$  | -44,9539              |
| B $\rightarrow$ D | 2   | $5.6311 \pm 8.9885$   | $-28.7669 \pm 5.1475$  | -23,1358              |
|                   | 3   | $-2.3268 \pm 7.9644$  | $-27.521 \pm 4.2873$   | -29,8478              |

### 3. Time series data for the corresponding histograms

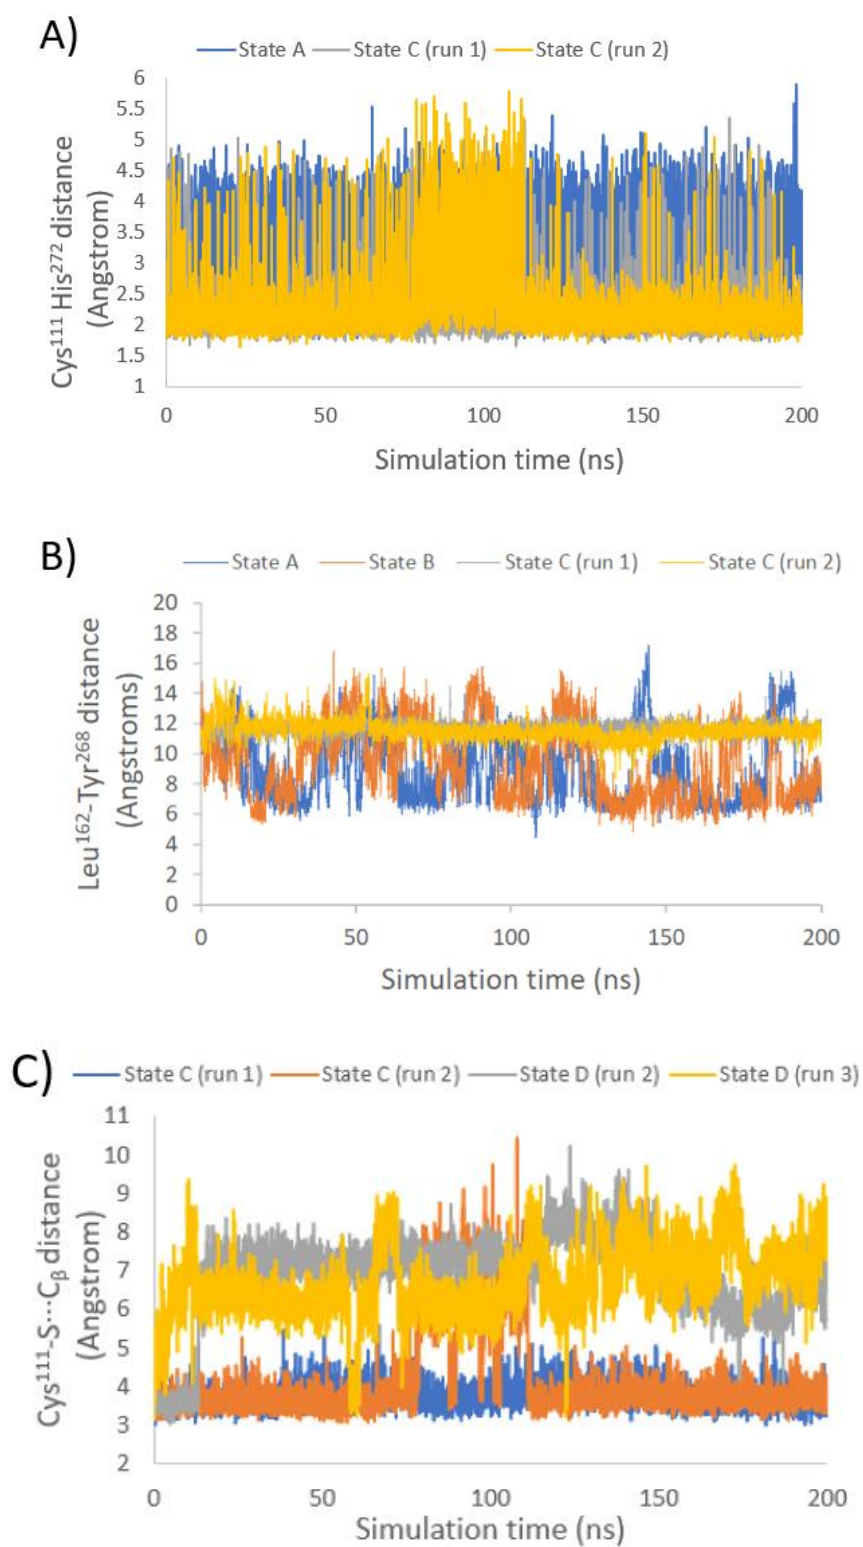

**Figure S2.** Time series data corresponding to histograms of A) figure 3B, B) figure 4C and C) figure 5B.

#### 4. Ligand departure from the protease pocket in state D

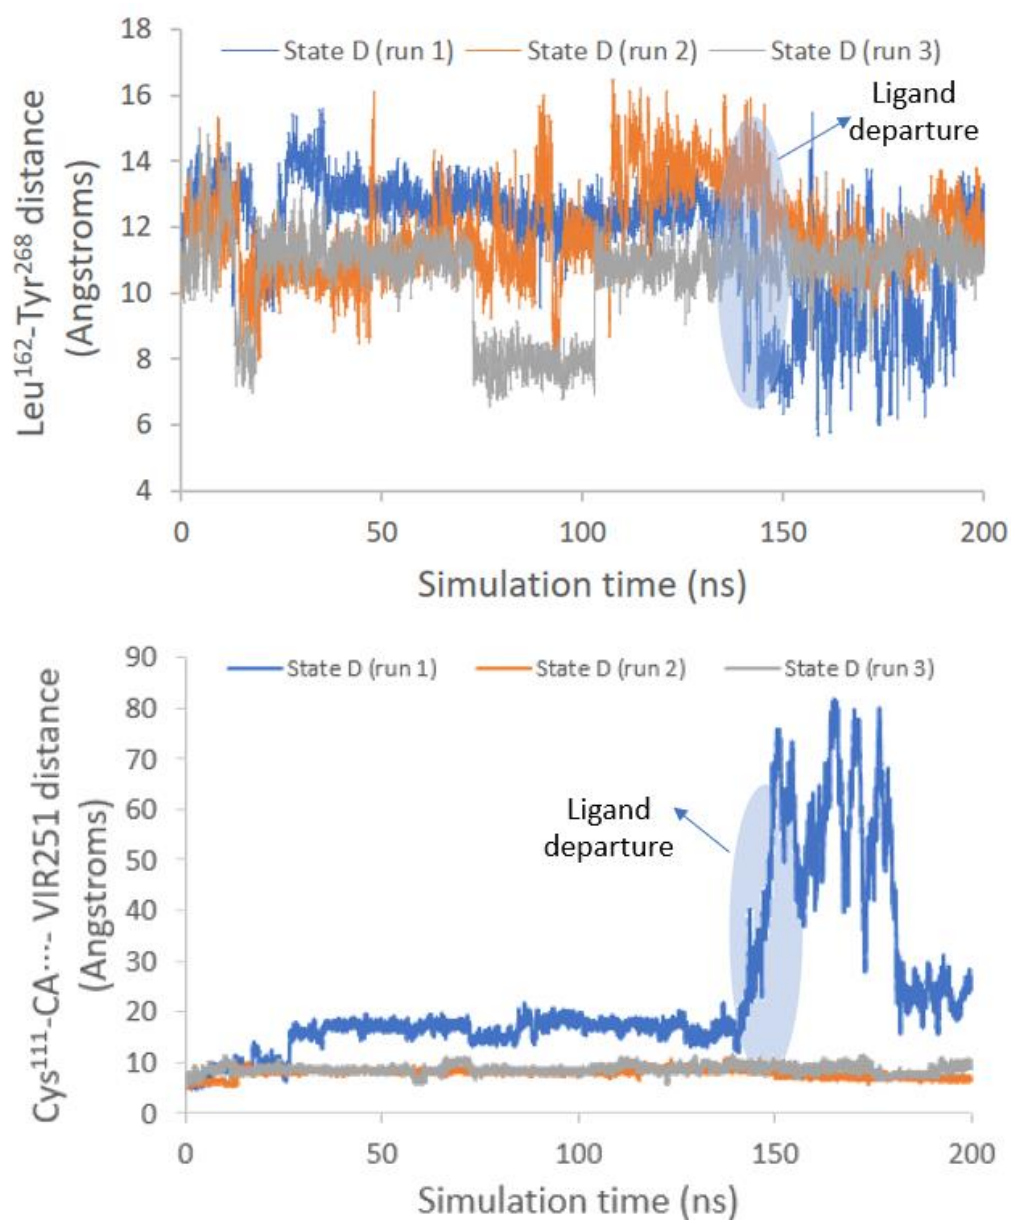

**Figure S3.** A) BL2 conformation measured through the Leu<sup>162</sup>-Tyr<sup>268</sup> distance and B) Cys<sup>111</sup>-VIR251 distance along the simulation time, showing both an abrupt change of their values when the ligand moves out from the protease pocket.

## 5. Analysis of the thiol group conformations for Cys<sup>111</sup>

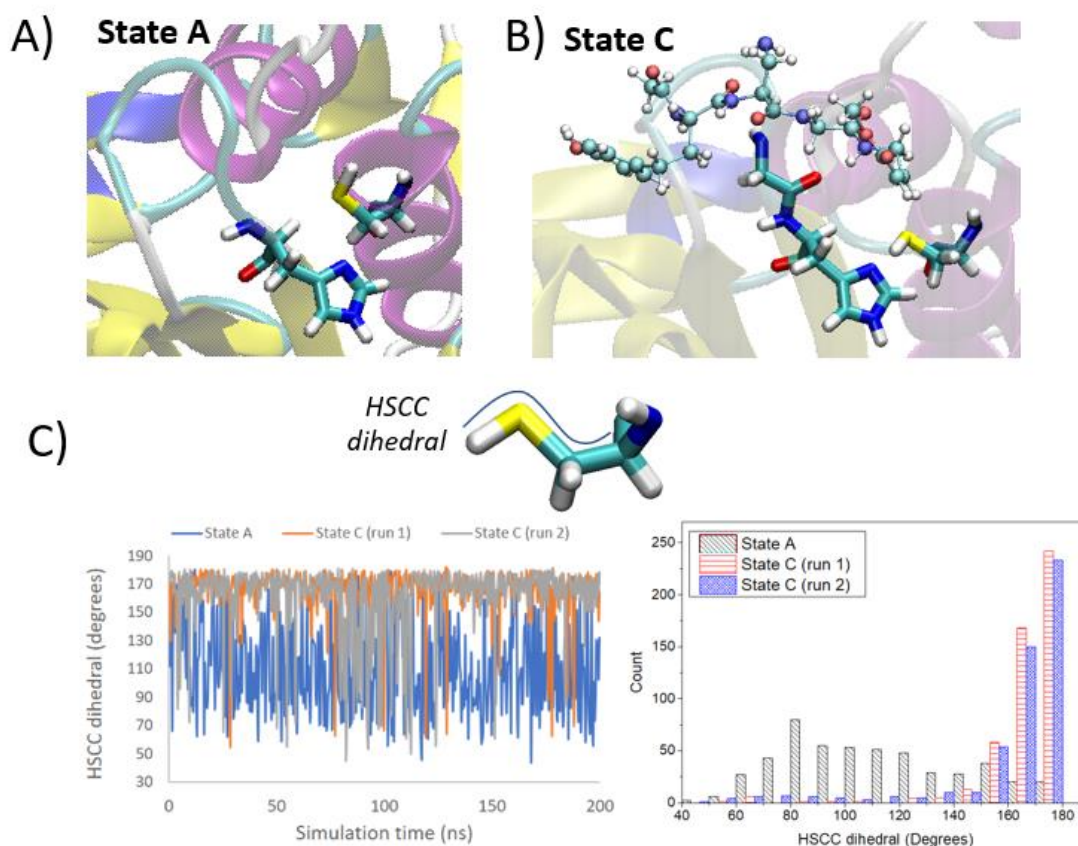

**Figure S4.** A) Representative snapshot of state A showing a particular conformation of Cys<sup>111</sup>, pointing outwards His<sup>272</sup> and hence, hampering the hydrogen-bond interaction. B) Representative snapshot of state B, with the thiol group pointing towards the His<sup>272</sup>. Ligand is depicted in CPK representation showing its position on top of Cys<sup>111</sup> hampering it's the S-C free rotation. C) Time series and histogram of the HSCC dihedral angle (defined in the figure) showing the conformations populated during the MD simulations of states A and C.

## 6. QM/MM energy barrier for Cys<sup>111</sup> deprotonation

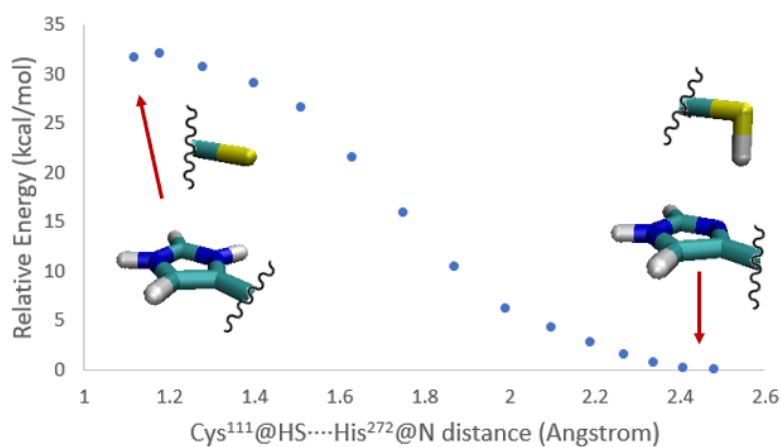

**Figure S5.** Energy barrier for the proton transfer process, from Cys<sup>111</sup> to His<sup>272</sup> computed for state A at the QM/MM level.



## 7. Hydrogen-bond interaction analysis

**Table S2.** Fraction of hydrogen-bond interactions found along the simulation time of each MD trajectory between the protease residues and the ligand.

| Residue   | State C (Run 1) | State C (Run 2) | State D (Run 2) | State D (Run 3) | State E (Run 1) | State E (Run 2) | State F (Run 1) | State F (Run 2) |
|-----------|-----------------|-----------------|-----------------|-----------------|-----------------|-----------------|-----------------|-----------------|
| Tyr 264   | 0.9158          | 0.6856          | 0.3016          | 0.6876          | 0.8654          |                 | 0.8650          | 0.3174          |
| Gly 271   | 0.7694          | 0.7776          | 0.1580          | 0.1990          | 0.7966          | 0.6394          | 0.6746          | 0.6798          |
| Gly 163@O | 0.6020          | 0.6344          | 0.5936          | 0.5630          | 0.7826          | 0.8106          | 0.7754          | 0.7598          |
| Gly 163@H | 0.3310          | 0.3216          | 0.5048          | 0.1560          | 0.5558          | 0.4406          | 0.4582          | 0.5256          |
| Tyr 268   | 0.5048          | 0.4120          | 0.1358          | 0.3190          | 0.4722          |                 | 0.1278          | 0.1598          |
| Arg 166   | 0.3304          | 0.3256          | <0.100          | 0.1504          | 0.4300          | 0.3868          |                 |                 |
| Tyr 273   |                 |                 |                 |                 |                 | 0.6078          |                 |                 |

## 8. BL2 loop conformation analysis for state D

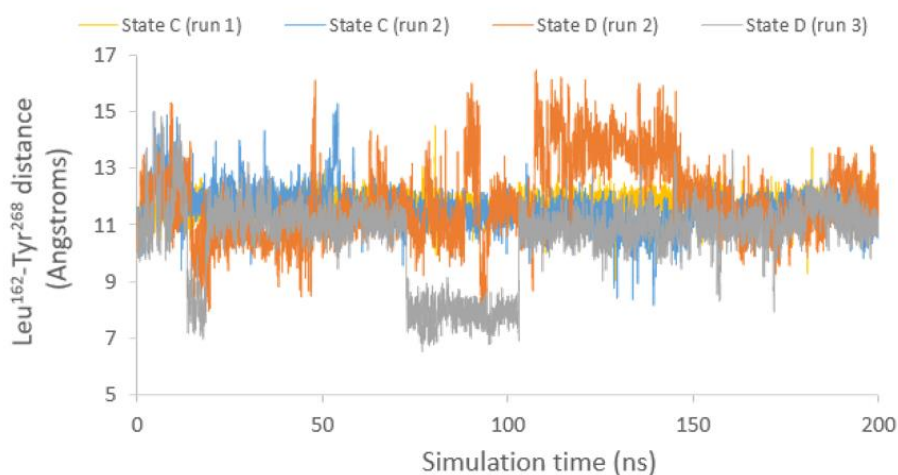

**Figure S6.** Leu<sup>162</sup>-Tyr<sup>268</sup> distance along the MD simulations of states C and D, showing a less stable conformation of the BL2 loop for state D.

## 9. Conformations of the ligand CH<sub>2</sub>-CO-NH group

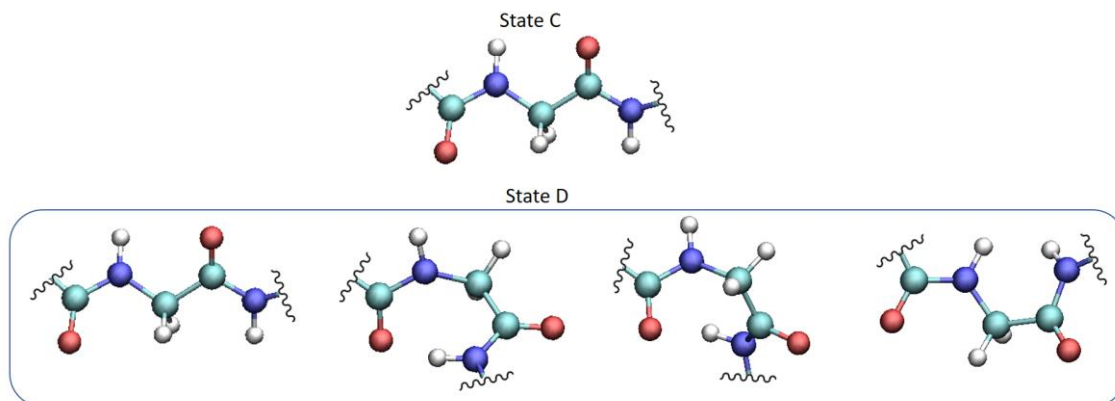

**Figure S7.** Schematic representations of the most populated conformation for the CH<sub>2</sub>-CO-NH group of the ligand for states C and D.

**10. Distance analysis for state D between the Cys<sup>111</sup>@S<sup>-</sup> and Vir251@C<sub>β</sub> or His<sup>272</sup>@H<sup>+</sup>**

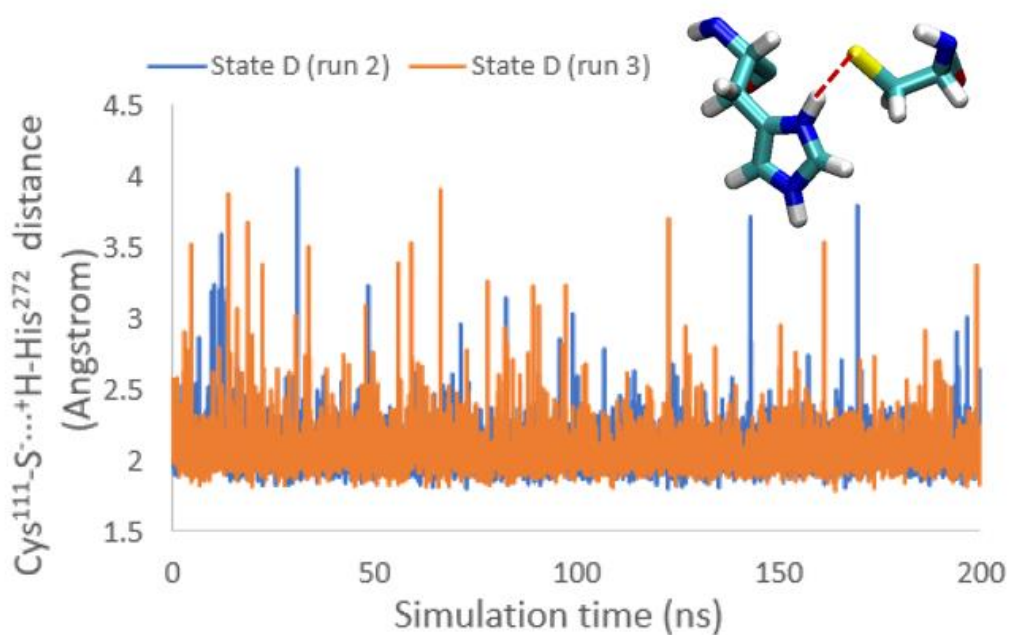

**Figure S8.** Distance between the negatively charged S atom of Cys<sup>111</sup> and the transferred proton to His<sup>272</sup> along the simulation time for the two independent simulations of state D.

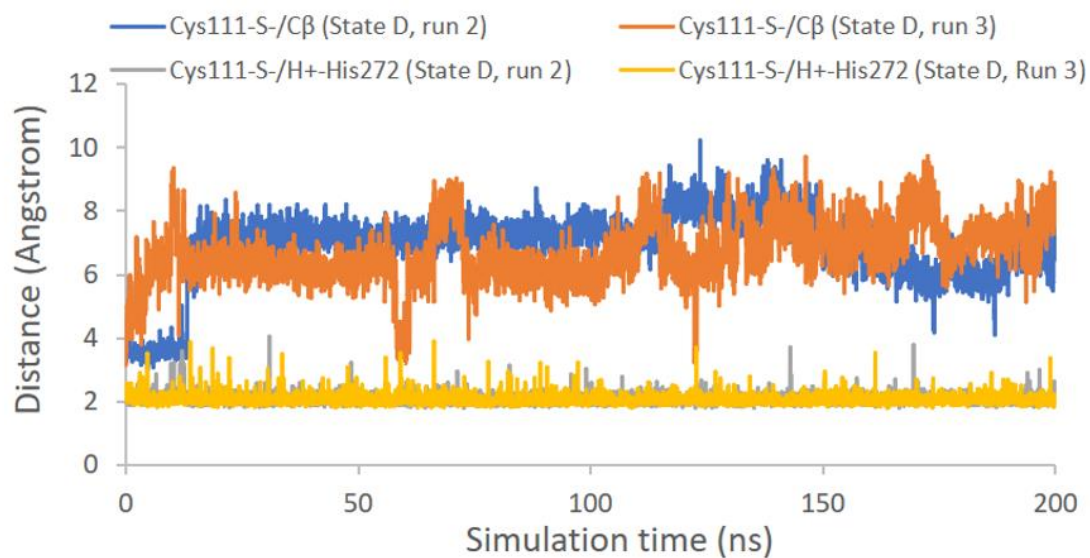

**Figure S9.** Cys<sup>111</sup>-S<sup>-</sup>...C<sub>β</sub>-VIR251 and Cys<sup>111</sup>-S<sup>-</sup>...+H-His<sup>272</sup> distance along the MD simulations of state D.

## 11. Hydrogen-bond interaction analysis between the vinyl methyl ester group and water molecules or protease side chains

**Table S3.** Fraction of hydrogen-bond interactions between the oxygen of the carbonyl group or oxygen of the methoxy group conforming the vinyl methyl ester group with water molecules or protease residues along the MD simulation.

| Residue                     | State C<br>(Run 1) | State C<br>(Run 2) | State D<br>(Run 2)                                     | State D<br>(Run 3) | State E<br>(Run 1) | State E<br>(Run 2) |
|-----------------------------|--------------------|--------------------|--------------------------------------------------------|--------------------|--------------------|--------------------|
| Carbonyl<br>oxygen<br>(C=O) | Water<br>(1.2170)  | Water<br>(1.2206)  | Water<br>(0.7406)<br>GLY <sup>160</sup> @H<br>(0.3836) | Water<br>(1.1598)  | Water<br>(1.8496)  | Water<br>(1.7736)  |
| Methoxy<br>oxygen<br>(OMe)  |                    |                    |                                                        |                    | Water<br>(0.4502)  | Water<br>(0.5310)  |

## 12. Ligand force field details

**Table S4.** Atom type, xyz coordinates of the optimized geometry and RESP charges for VIR251 state C and D.

| Name | X       | Y       | Z       | Atom type | Charge    |
|------|---------|---------|---------|-----------|-----------|
| C1   | -6.4700 | -1.9210 | -0.2790 | c         | 0.880559  |
| O1   | -6.6230 | -1.0080 | -1.1040 | o         | -0.664432 |
| C2   | -7.4510 | -3.0730 | -0.1840 | c3        | -0.486499 |
| N1   | -5.4270 | -1.9560 | 0.5900  | n         | -0.809988 |
| C3   | -4.3860 | -0.9340 | 0.6550  | c3        | 0.242707  |
| C4   | -3.0300 | -1.6600 | 0.6170  | c         | 0.483729  |
| C5   | -4.5310 | -0.0850 | 1.9360  | c3        | 0.008453  |
| C6   | -3.5510 | 1.1020  | 2.0470  | c3        | -0.132125 |
| C7   | -3.7470 | 2.1890  | 1.0060  | ca        | 0.058878  |
| C8   | -2.7860 | 2.4390  | 0.0140  | ca        | -0.178927 |
| C9   | -2.9620 | 3.4440  | -0.9400 | ca        | -0.331208 |
| C10  | -4.1190 | 4.2270  | -0.9150 | ca        | 0.430254  |
| C11  | -5.0930 | 4.0010  | 0.0650  | ca        | -0.331208 |
| C12  | -4.8990 | 2.9920  | 1.0110  | ca        | -0.178927 |
| O2   | -4.2460 | 5.2060  | -1.8720 | oh        | -0.572924 |
| O3   | -2.7470 | -2.4990 | 1.4830  | o         | -0.587626 |
| N2   | -2.2090 | -1.3220 | -0.4010 | n         | -0.396462 |
| C13  | -0.8790 | -1.8790 | -0.6020 | c3        | -0.012751 |
| C14  | 0.1140  | -0.7160 | -0.7440 | c         | 0.450022  |
| O4   | -0.1600 | 0.2640  | -1.4520 | o         | -0.544209 |
| C15  | -0.8020 | -2.7680 | -1.8650 | c3        | 0.256483  |
| N3   | -1.6720 | -3.9400 | -1.7430 | n3        | -0.967320 |



|            |         |         |         |    |           |
|------------|---------|---------|---------|----|-----------|
| <b>N4</b>  | 1.2840  | -0.8470 | -0.0920 | n  | -0.288379 |
| <b>C16</b> | 2.3360  | 0.1450  | -0.1740 | c3 | -0.329888 |
| <b>C17</b> | 3.4940  | -0.2830 | 0.7300  | c  | 0.752807  |
| <b>O5</b>  | 3.4430  | -1.3280 | 1.3890  | o  | -0.554363 |
| <b>N5</b>  | 4.5440  | 0.5670  | 0.7460  | n  | -0.763331 |
| <b>C18</b> | 5.7520  | 0.3510  | 1.5410  | c3 | 0.316863  |
| <b>C19</b> | 6.9170  | -0.0610 | 0.6840  | c2 | -0.003945 |
| <b>C20</b> | 8.0930  | 0.5810  | 0.6580  | ce | -0.588760 |
| <b>C21</b> | 9.2090  | 0.1160  | -0.1960 | c  | 0.977035  |
| <b>O6</b>  | 10.2760 | 0.9340  | -0.0790 | os | -0.437097 |
| <b>O7</b>  | 9.1970  | -0.8690 | -0.9200 | o  | -0.626795 |
| <b>C22</b> | 11.4410 | 0.5960  | -0.8630 | c3 | -0.039803 |
| <b>H1</b>  | 4.5100  | 1.3910  | 0.1590  | hn | 0.385284  |
| <b>H2</b>  | 1.4720  | -1.6420 | 0.5100  | hn | 0.223695  |
| <b>H3</b>  | -1.2620 | -4.6250 | -1.1120 | hn | 0.368908  |
| <b>H4</b>  | -1.7640 | -4.3970 | -2.6460 | hn | 0.368908  |
| <b>H5</b>  | -5.3510 | -2.7280 | 1.2390  | hn | 0.394975  |
| <b>H6</b>  | -2.5050 | -0.6120 | -1.0590 | hn | 0.296740  |
| <b>H7</b>  | -5.0800 | 5.6830  | -1.7520 | ho | 0.386050  |
| <b>H8</b>  | -8.4410 | -2.6720 | 0.0520  | hc | 0.131871  |
| <b>H9</b>  | -7.1780 | -3.8140 | 0.5710  | hc | 0.131871  |
| <b>H10</b> | -7.5140 | -3.5630 | -1.1590 | hc | 0.131871  |
| <b>H11</b> | -1.8780 | 1.8420  | -0.0200 | ha | 0.162798  |
| <b>H12</b> | -2.2090 | 3.6270  | -1.7010 | ha | 0.187063  |
| <b>H13</b> | -5.9920 | 4.6110  | 0.0920  | ha | 0.187063  |
| <b>H14</b> | -5.6620 | 2.8360  | 1.7700  | ha | 0.162798  |
| <b>H15</b> | 0.2560  | -3.0220 | -2.0320 | h1 | 0.018087  |
| <b>H16</b> | -1.1340 | -2.1780 | -2.7250 | h1 | 0.018087  |
| <b>H17</b> | 1.9650  | 1.1270  | 0.1400  | h1 | 0.164031  |
| <b>H18</b> | 2.6930  | 0.2490  | -1.2060 | h1 | 0.164031  |
| <b>H19</b> | 8.2730  | 1.4670  | 1.2600  | ha | 0.207645  |
| <b>H20</b> | 12.1650 | 1.3840  | -0.6580 | h1 | 0.092731  |
| <b>H21</b> | 11.1890 | 0.5720  | -1.9260 | h1 | 0.092731  |
| <b>H22</b> | 11.8330 | -0.3760 | -0.5550 | h1 | 0.092731  |
| <b>H23</b> | -4.5140 | -0.3030 | -0.2270 | h1 | 0.094168  |
| <b>H24</b> | -4.3980 | -0.7440 | 2.8020  | hc | 0.014723  |
| <b>H25</b> | -5.5630 | 0.2820  | 1.9660  | hc | 0.014723  |
| <b>H26</b> | -2.5180 | 0.7360  | 2.0030  | hc | 0.055631  |
| <b>H27</b> | -3.6760 | 1.5330  | 3.0480  | hc | 0.055631  |
| <b>H28</b> | 5.5200  | -0.4420 | 2.2580  | h1 | 0.035621  |
| <b>H29</b> | 5.9800  | 1.2630  | 2.1010  | h1 | 0.035621  |
| <b>H30</b> | 6.7740  | -0.9390 | 0.0560  | ha | 0.135263  |
| <b>H31</b> | -0.6490 | -2.4800 | 0.2820  | h1 | 0.157827  |

**Table S5.** Atom type, xyz coordinates of the optimized geometry and RESP charges for VIR251 state E.

| Name | X       | Y       | Z       | Atom type | Charge    |
|------|---------|---------|---------|-----------|-----------|
| N1   | -6.9380 | -1.5930 | 0.2770  | N         | -0.395868 |
| C1   | -6.9770 | -2.0750 | -1.1140 | CT        | -0.047432 |
| H1   | -8.0070 | -2.3520 | -1.3950 | H1        | 0.081191  |
| C2   | -6.5640 | -0.9100 | -2.0680 | CT        | -0.152196 |
| S1   | -4.9380 | -0.0640 | -1.7480 | S         | -0.405786 |
| C3   | -6.1540 | -3.3760 | -1.3530 | C         | 0.625516  |
| O1   | -6.7290 | -4.4140 | -1.7390 | O         | -0.632980 |
| C4   | 7.6370  | -1.4410 | 1.6000  | C         | 0.772756  |
| O2   | 8.0690  | -0.3100 | 1.4160  | O         | -0.628271 |
| C5   | 8.4760  | -2.5280 | 2.2510  | CT        | -0.498254 |
| N2   | 6.3670  | -1.7980 | 1.2760  | N         | -0.579361 |
| C6   | 5.3630  | -0.9010 | 0.6600  | CT        | 0.200970  |
| C7   | 4.2310  | -0.6150 | 1.6470  | C         | 0.525652  |
| C8   | 4.7720  | -1.4790 | -0.6630 | CT        | 0.000758  |
| C9   | 5.8440  | -1.8940 | -1.7120 | CT        | -0.104643 |
| C10  | 6.8100  | -0.7740 | -2.1080 | CA        | 0.104245  |
| C11  | 6.3340  | 0.3900  | -2.7370 | CA        | -0.237827 |
| C12  | 7.2270  | 1.4010  | -3.1220 | CA        | -0.292525 |
| C13  | 8.6010  | 1.2550  | -2.8850 | CA        | 0.422208  |
| C14  | 9.0810  | 0.0940  | -2.2600 | CA        | -0.292525 |
| C15  | 8.1880  | -0.9150 | -1.8760 | CA        | -0.237827 |
| O3   | 9.4690  | 2.2400  | -3.2730 | OH        | -0.582249 |
| O4   | 3.9100  | -1.4000 | 2.5330  | O         | -0.571752 |
| N3   | 3.5220  | 0.5170  | 1.4000  | N         | -0.608273 |
| C16  | 2.4350  | 1.0380  | 2.2560  | CT        | -0.013109 |
| C17  | 1.2770  | 1.5200  | 1.3870  | C         | 0.669608  |
| O5   | 1.1720  | 2.6800  | 1.0010  | O         | -0.611548 |
| C18  | 2.9280  | 2.1630  | 3.2060  | CT        | 0.276963  |
| N4   | 3.9500  | 1.6640  | 4.1590  | NT        | -0.944886 |
| N5   | 0.4550  | 0.5360  | 0.9360  | N         | -0.631801 |
| C19  | -0.6750 | 0.7370  | 0.0050  | CT        | -0.057608 |
| C20  | -2.0280 | 0.5510  | 0.6810  | C         | 0.705872  |
| O6   | -2.2540 | -0.3930 | 1.4270  | O         | -0.633145 |
| N6   | -2.9980 | 1.4330  | 0.3040  | N         | -0.534075 |
| C21  | -4.4080 | 1.2660  | 0.6740  | CT        | -0.009154 |
| C22  | -5.3560 | 1.3530  | -0.5580 | CT        | 0.561084  |
| C23  | -5.3350 | 2.7100  | -1.2220 | CM        | -1.169581 |
| C24  | -5.9700 | 3.7570  | -0.5540 | C         | 0.964388  |
| O7   | -5.7180 | 5.0400  | -1.1140 | OS        | -0.477979 |
| O8   | -6.7170 | 3.6860  | 0.4760  | O         | -0.789536 |
| C25  | -6.2080 | 6.1630  | -0.3660 | CT        | -0.005846 |
| H2   | -2.7670 | 2.2250  | -0.2940 | H         | 0.323893  |

|     |         |         |         |    |          |
|-----|---------|---------|---------|----|----------|
| H3  | 0.6210  | -0.4070 | 1.2600  | H  | 0.348382 |
| H4  | 3.5620  | 0.9270  | 4.7550  | H  | 0.357922 |
| H5  | 4.2710  | 2.4180  | 4.7790  | H  | 0.357922 |
| H6  | 6.0670  | -2.7400 | 1.4850  | H  | 0.316155 |
| H7  | 3.8100  | 1.1110  | 0.6250  | H  | 0.369668 |
| H8  | 10.3820 | 1.9940  | -3.0410 | HO | 0.389405 |
| H9  | 9.4240  | -2.6470 | 1.6980  | HC | 0.134055 |
| H10 | 7.9600  | -3.4970 | 2.2370  | HC | 0.134055 |
| H11 | 8.7000  | -2.2650 | 3.2810  | HC | 0.134055 |
| H12 | 5.2650  | 0.5200  | -2.9390 | HA | 0.186364 |
| H13 | 6.8530  | 2.3100  | -3.6120 | HA | 0.179764 |
| H14 | 10.1560 | -0.0190 | -2.0830 | HA | 0.179764 |
| H15 | 8.5770  | -1.8150 | -1.4010 | HA | 0.186364 |
| H16 | 2.0880  | 2.5630  | 3.7790  | H1 | 0.014315 |
| H17 | 3.3750  | 2.9800  | 2.6150  | H1 | 0.014315 |
| H18 | -0.6130 | 0.0020  | -0.7960 | H1 | 0.108304 |
| H19 | -0.6340 | 1.7470  | -0.4340 | H1 | 0.108304 |
| H20 | -5.6790 | 7.0430  | -0.7550 | H1 | 0.054318 |
| H21 | -6.0010 | 6.0520  | 0.7100  | H1 | 0.054318 |
| H22 | -7.2940 | 6.3000  | -0.4990 | H1 | 0.054318 |
| H23 | 5.8400  | 0.0680  | 0.4310  | H1 | 0.091267 |
| H24 | 4.1020  | -0.7280 | -1.1140 | HC | 0.020257 |
| H25 | 4.1560  | -2.3530 | -0.4320 | HC | 0.020257 |
| H26 | 5.3250  | -2.2410 | -2.6220 | HC | 0.033246 |
| H27 | 6.4070  | -2.7530 | -1.3370 | HC | 0.033246 |
| H28 | -4.7120 | 2.0720  | 1.3620  | H1 | 0.064090 |
| H29 | -4.4900 | 0.3080  | 1.2040  | H1 | 0.064090 |
| H30 | 2.0430  | 0.2180  | 2.8740  | H1 | 0.138059 |
| H31 | -7.3560 | -0.1470 | -2.0810 | H1 | 0.132671 |
| H32 | -6.4830 | -1.3140 | -3.0880 | H1 | 0.132671 |
| H33 | -6.3720 | 1.1630  | -0.1710 | H1 | 0.060992 |
| H38 | -6.6460 | -0.6280 | 0.4050  | H  | 0.207071 |
| H42 | -4.6500 | 2.9090  | -2.0470 | HA | 0.230939 |

**Table S6.** Atom type, xyz coordinates of the optimized geometry and RESP charges for VIR251 state F.

| Name | X       | Y       | Z       | Atom type | Charge    |
|------|---------|---------|---------|-----------|-----------|
| N1   | -6.9060 | -1.6420 | 0.3390  | N         | -0.532183 |
| C1   | -6.9230 | -2.1450 | -1.0480 | CT        | 0.051602  |
| H1   | -7.9450 | -2.4440 | -1.3360 | H1        | 0.085178  |
| C2   | -6.5250 | -0.9900 | -2.0210 | CT        | -0.168901 |
| S1   | -4.8990 | -0.1350 | -1.7140 | S         | -0.280978 |
| C3   | -6.0690 | -3.4280 | -1.2700 | C         | 0.588075  |
| O1   | -6.6190 | -4.4730 | -1.6810 | O         | -0.605077 |

|            |         |         |         |    |           |
|------------|---------|---------|---------|----|-----------|
| <b>C4</b>  | 7.6270  | -1.4040 | 1.6520  | C  | 0.783638  |
| <b>O2</b>  | 8.0660  | -0.2850 | 1.4380  | O  | -0.619624 |
| <b>C5</b>  | 8.4570  | -2.4830 | 2.3350  | CT | -0.536694 |
| <b>N2</b>  | 6.3540  | -1.7660 | 1.3280  | N  | -0.573136 |
| <b>C6</b>  | 5.3600  | -0.8790 | 0.6840  | CT | 0.188440  |
| <b>C7</b>  | 4.2240  | -0.5590 | 1.6580  | C  | 0.528873  |
| <b>C8</b>  | 4.7730  | -1.4870 | -0.6260 | CT | -0.002599 |
| <b>C9</b>  | 5.8490  | -1.9360 | -1.6610 | CT | -0.103672 |
| <b>C10</b> | 6.8240  | -0.8310 | -2.0800 | CA | 0.101005  |
| <b>C11</b> | 6.3590  | 0.3200  | -2.7420 | CA | -0.234686 |
| <b>C12</b> | 7.2600  | 1.3160  | -3.1470 | CA | -0.296047 |
| <b>C13</b> | 8.6330  | 1.1660  | -2.8990 | CA | 0.435855  |
| <b>C14</b> | 9.1030  | 0.0190  | -2.2420 | CA | -0.296047 |
| <b>C15</b> | 8.1980  | -0.9750 | -1.8310 | CA | -0.234686 |
| <b>O3</b>  | 9.5120  | 2.1410  | -3.3000 | OH | -0.590521 |
| <b>O4</b>  | 3.8950  | -1.3200 | 2.5660  | O  | -0.565310 |
| <b>N3</b>  | 3.5210  | 0.5730  | 1.3750  | N  | -0.598755 |
| <b>C16</b> | 2.4340  | 1.1190  | 2.2150  | CT | -0.022317 |
| <b>C17</b> | 1.2800  | 1.5870  | 1.3270  | C  | 0.665286  |
| <b>O5</b>  | 1.1800  | 2.7400  | 0.9140  | O  | -0.608917 |
| <b>C18</b> | 2.9330  | 2.2680  | 3.1400  | CT | 0.283176  |
| <b>N4</b>  | 3.9440  | 1.7850  | 4.1120  | NT | -0.941680 |
| <b>N5</b>  | 0.4560  | 0.5980  | 0.8960  | N  | -0.596828 |
| <b>C19</b> | -0.6670 | 0.7810  | -0.0460 | CT | -0.057821 |
| <b>C20</b> | -2.0260 | 0.6200  | 0.6270  | C  | 0.688906  |
| <b>O6</b>  | -2.2630 | -0.3010 | 1.3970  | O  | -0.586121 |
| <b>N6</b>  | -2.9780 | 1.5120  | 0.1970  | N  | -0.542234 |
| <b>C21</b> | -4.3910 | 1.4290  | 0.5780  | CT | 0.019361  |
| <b>C22</b> | -5.3660 | 1.3220  | -0.6280 | CT | 0.075540  |
| <b>C23</b> | -5.4760 | 2.6230  | -1.4640 | CT | -0.611921 |
| <b>C24</b> | -6.1200 | 3.7510  | -0.6550 | C  | 0.980876  |
| <b>O7</b>  | -5.5070 | 4.9380  | -0.8570 | OS | -0.451921 |
| <b>O8</b>  | -7.0880 | 3.6030  | 0.0800  | O  | -0.622342 |
| <b>C25</b> | -6.0610 | 6.0850  | -0.1460 | CT | -0.041163 |
| <b>H2</b>  | -2.6740 | 2.3090  | -0.3580 | H  | 0.334897  |
| <b>H3</b>  | 0.6210  | -0.3480 | 1.2440  | H  | 0.346424  |
| <b>H4</b>  | 3.5490  | 1.0670  | 4.7210  | H  | 0.364190  |
| <b>H5</b>  | 4.2640  | 2.5560  | 4.7120  | H  | 0.364190  |
| <b>H6</b>  | 6.0520  | -2.6990 | 1.5640  | H  | 0.318191  |
| <b>H7</b>  | 3.8280  | 1.1430  | 0.5930  | H  | 0.374131  |
| <b>H8</b>  | 10.4320 | 1.9030  | -3.0550 | HO | 0.400920  |
| <b>H9</b>  | 9.4160  | -2.6130 | 1.7930  | HC | 0.148401  |
| <b>H10</b> | 7.9390  | -3.4500 | 2.3440  | HC | 0.148401  |
| <b>H11</b> | 8.6820  | -2.1880 | 3.3720  | HC | 0.148401  |
| <b>H12</b> | 5.3010  | 0.4460  | -2.9510 | HA | 0.187440  |

|            |         |         |         |    |          |
|------------|---------|---------|---------|----|----------|
| <b>H13</b> | 6.8980  | 2.2130  | -3.6630 | HA | 0.183363 |
| <b>H14</b> | 10.1800 | -0.1070 | -2.0510 | HA | 0.183363 |
| <b>H15</b> | 8.5920  | -1.8620 | -1.3360 | HA | 0.187440 |
| <b>H16</b> | 2.0860  | 2.6840  | 3.6950  | H1 | 0.012748 |
| <b>H17</b> | 3.3860  | 3.0640  | 2.5270  | H1 | 0.012748 |
| <b>H18</b> | -0.5990 | 0.0120  | -0.8310 | H1 | 0.110117 |
| <b>H19</b> | -0.6110 | 1.7730  | -0.5130 | H1 | 0.110117 |
| <b>H20</b> | -5.4070 | 6.9250  | -0.4010 | H1 | 0.100978 |
| <b>H21</b> | -6.0490 | 5.9000  | 0.9380  | H1 | 0.100978 |
| <b>H22</b> | -7.0890 | 6.2790  | -0.4800 | H1 | 0.100978 |
| <b>H23</b> | 5.8500  | 0.0820  | 0.4350  | H1 | 0.091801 |
| <b>H24</b> | 4.1180  | -0.7470 | -1.1000 | HC | 0.015572 |
| <b>H25</b> | 4.1600  | -2.3550 | -0.3740 | HC | 0.015572 |
| <b>H26</b> | 5.3440  | -2.3060 | -2.5600 | HC | 0.040874 |
| <b>H27</b> | 6.4160  | -2.7900 | -1.2540 | HC | 0.040874 |
| <b>H28</b> | -4.6690 | 2.3120  | 1.1810  | H1 | 0.092366 |
| <b>H29</b> | -4.4940 | 0.5460  | 1.2220  | H1 | 0.092366 |
| <b>H30</b> | 2.0370  | 0.3150  | 2.8510  | H1 | 0.137176 |
| <b>H31</b> | -7.3220 | -0.2330 | -2.0420 | H1 | 0.142467 |
| <b>H32</b> | -6.4440 | -1.4050 | -3.0350 | H1 | 0.142467 |
| <b>H33</b> | -6.3680 | 1.1310  | -0.2140 | H1 | 0.133942 |
| <b>H34</b> | -6.1340 | 2.4420  | -2.3300 | HC | 0.186709 |
| <b>H35</b> | -4.5040 | 2.9450  | -1.8630 | HC | 0.186709 |
| <b>H40</b> | -6.7630 | -0.6430 | 0.4530  | H  | 0.289036 |
